# Supplementary material
Source: publisher figshare collection journal article supplement (https://acs.figshare.com/ndownloader/files/4188304)
Supplement: Supplementary file 1 [file 4188304]

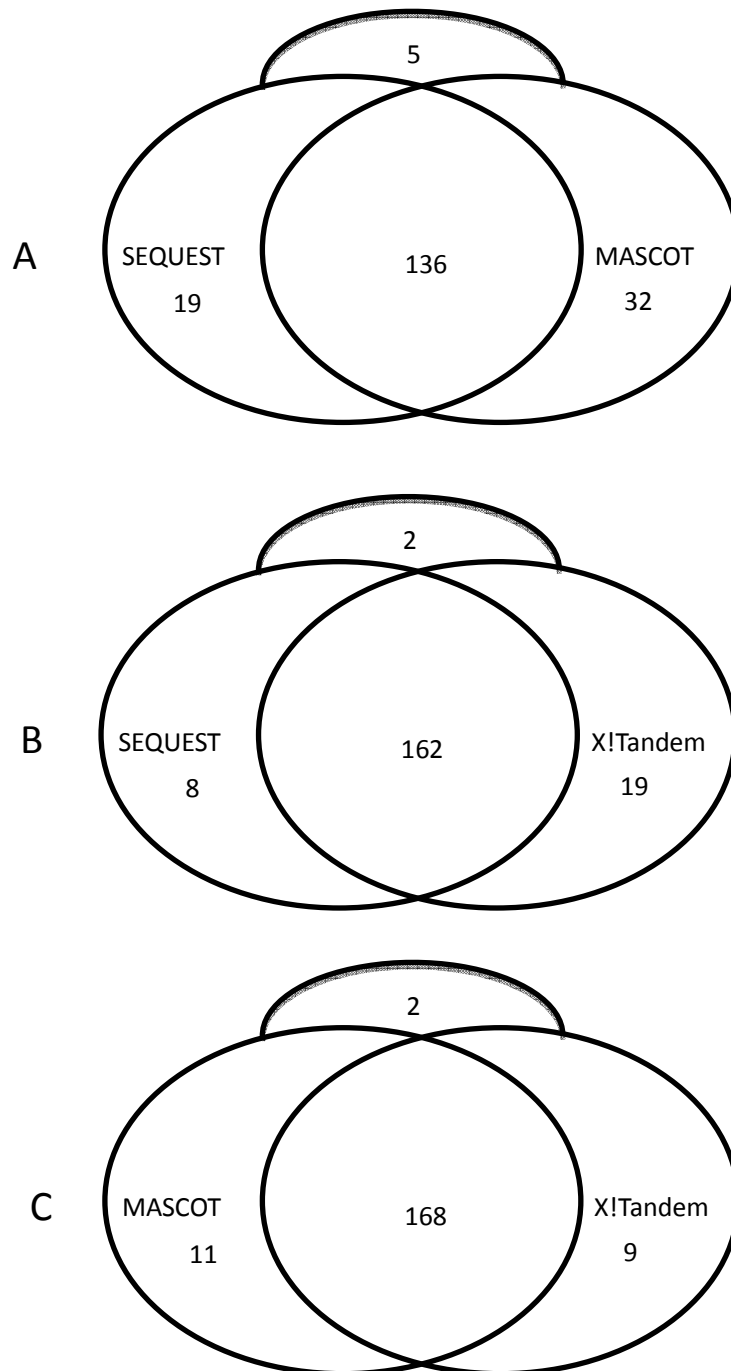

Supplementary figure 2, Two-hit proteins identified by integration of two search engine results. Figure 2A indicates that there were 136 two-hit proteins identified by both Sequest and MASCOT, 19 two-hit proteins by Sequest only, 32 two-hit proteins by MASCOT only and 5 two-hit proteins that each engine contributed a unique peptide. Figure 2B indicates that there were 162 two-hit proteins identified by both Sequest and X!Tandem, 8 two-hit proteins by Sequest only, 19 two-hit proteins by X!Tandem only and 2 two-hit proteins that each engine contributed a unique peptide. Figure 2C indicates that there were 168 two-hit proteins identified by both MASCOT and X!Tandem, 11 two-hit proteins by MASCOT only, 9 two-hit proteins by X!Tandem only and 2 two-hit proteins that each engine contributed a unique peptide.
